# Supplementary material for: Increased incidence, duration and intensity of groundwater drought associated with anthropogenic warming
Source: Copernicus journal article supplement (doi:10.5194/hess-2018-244), 2018-06-21
Supplement: Supplementary file 1 [file hess-2018-244-supplement.pdf]

1 **Increased incidence, intensity and duration of groundwater**  
2 **drought in the Chalk of the UK associated with anthropogenic**  
3 **warming**

4 John P. Bloomfield<sup>1</sup>, Benjamin P. Marchant<sup>2</sup>, Andrew A. McKenzie<sup>1</sup>

5 **Supplementary information**

6 **Figures**

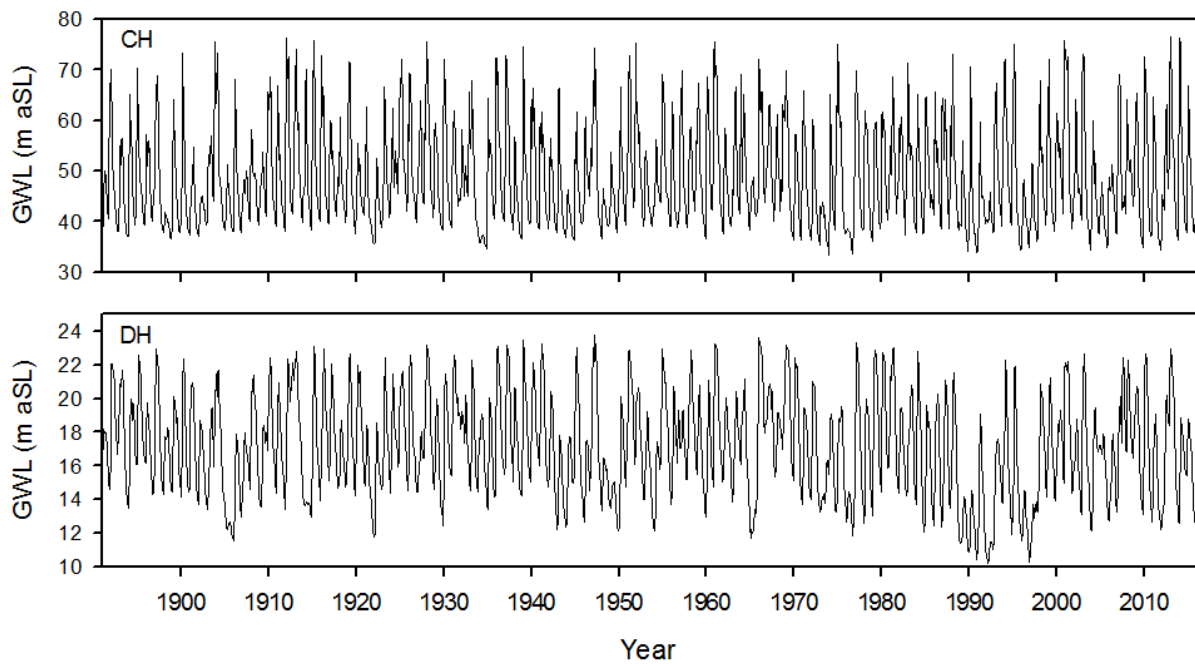

7

8 **Figure S1. Monthly groundwater levels at CH and DH.**

9

10

11

12

13

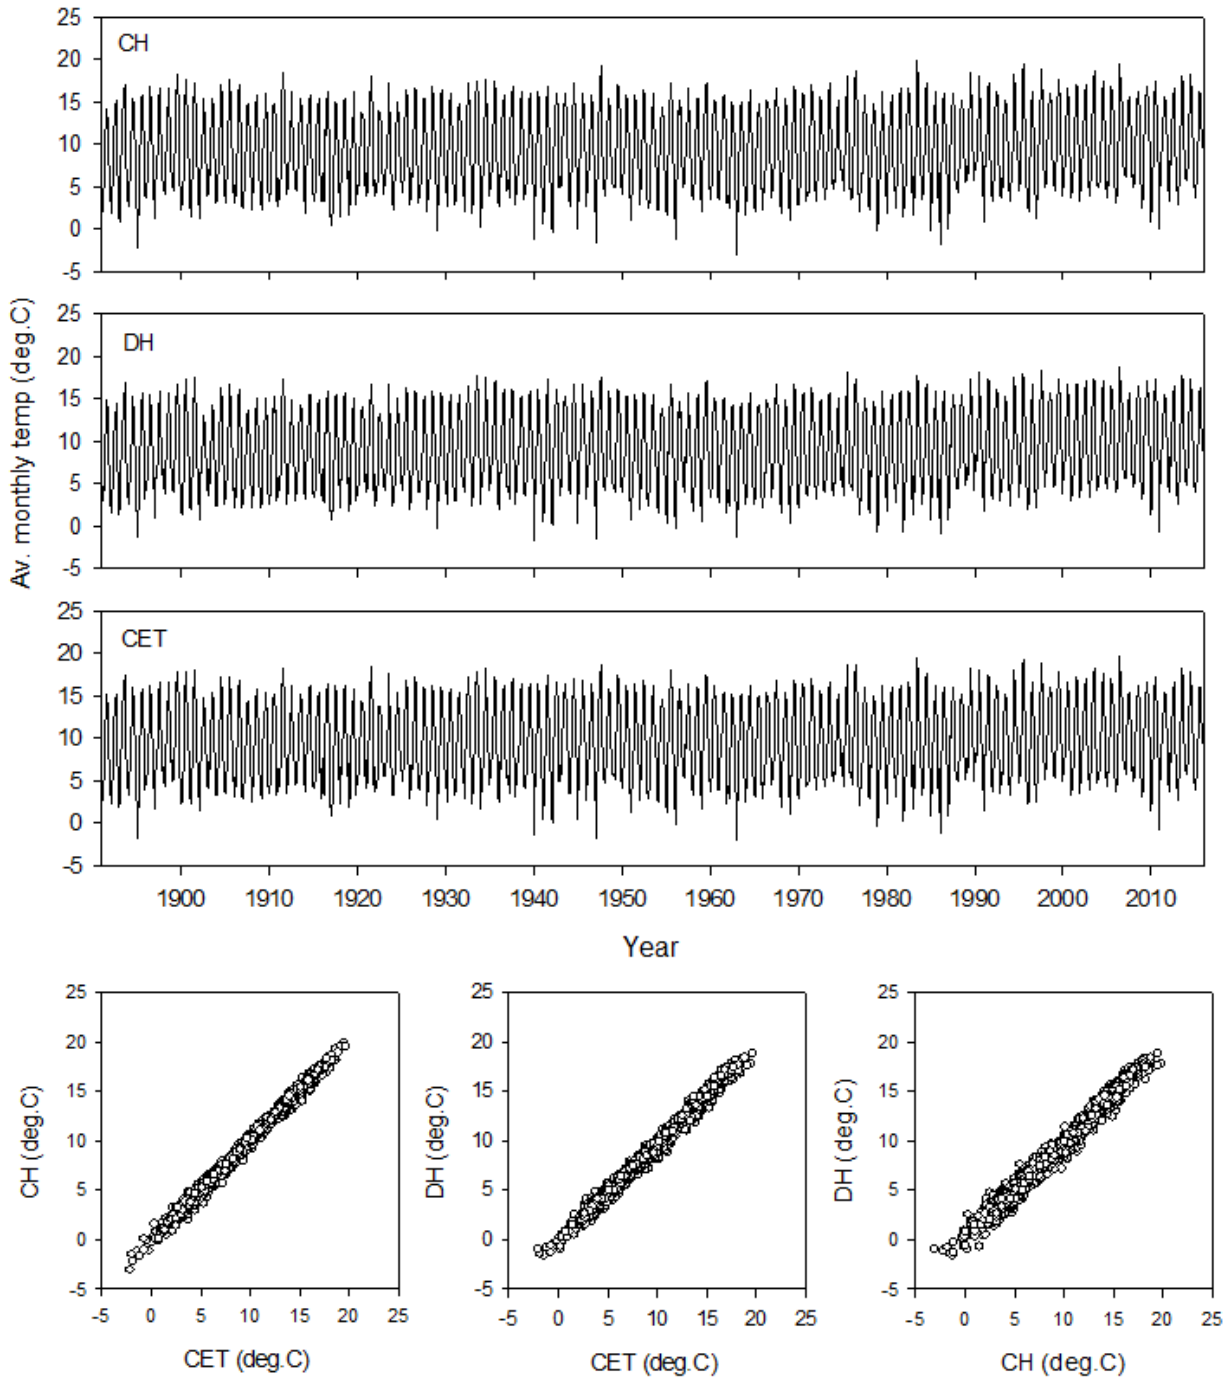

15

16 **Figure S2. Monthly average air temperature at CH and DH and monthly CET. Cross plots of Monthly average air**  
17 **temperature at CH and DH and monthly CET.**

18

19

20

21

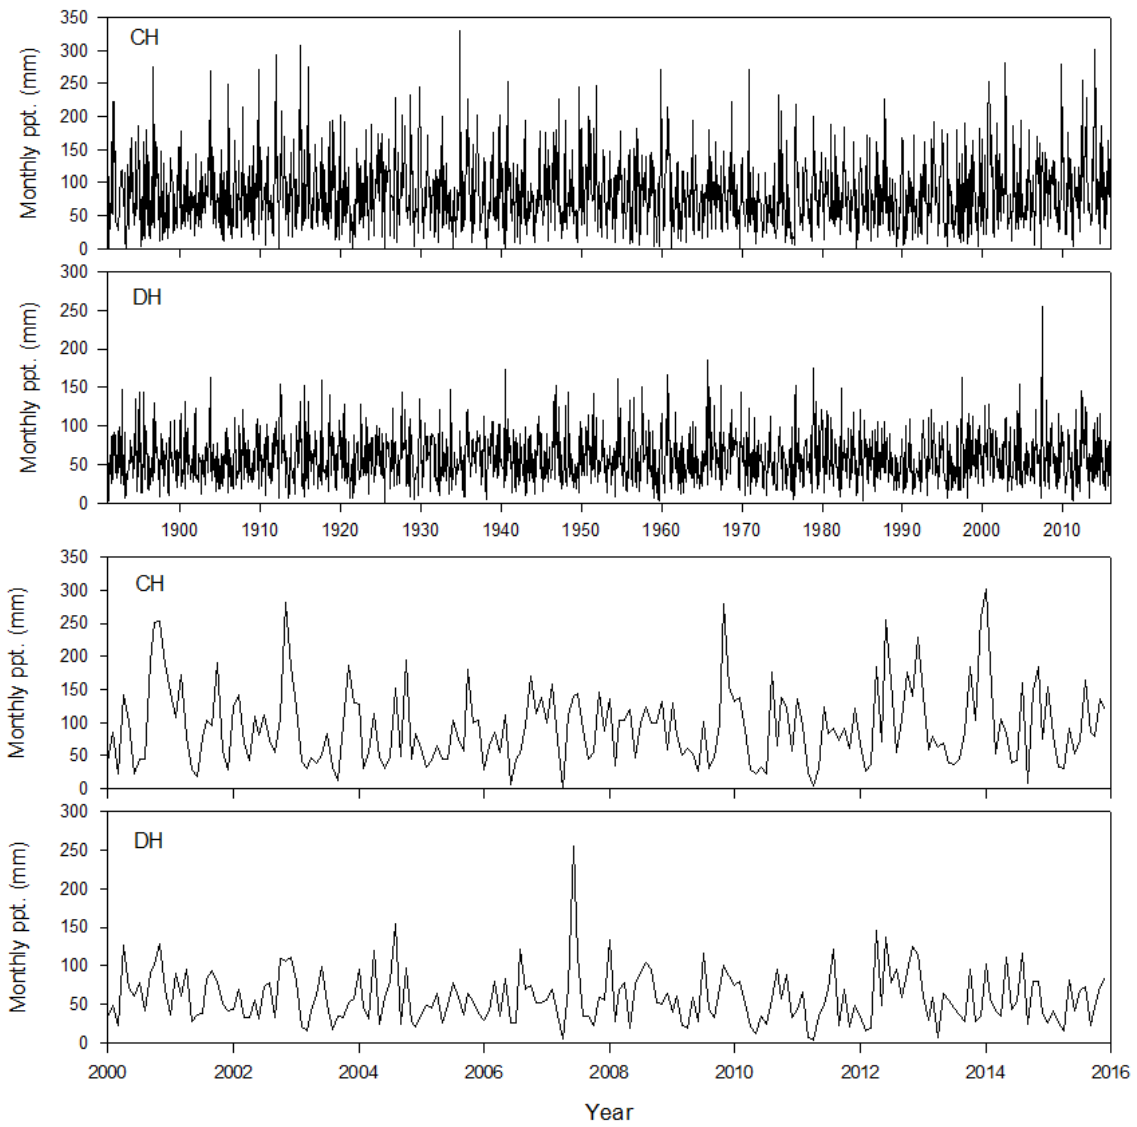

22

23 **Figure S3. Monthly total precipitation at CH and DH (for the full observation record from 1891 to 2015 and for the**  
 24 **last 15 years of the record).**

25

26

27

28

29

30

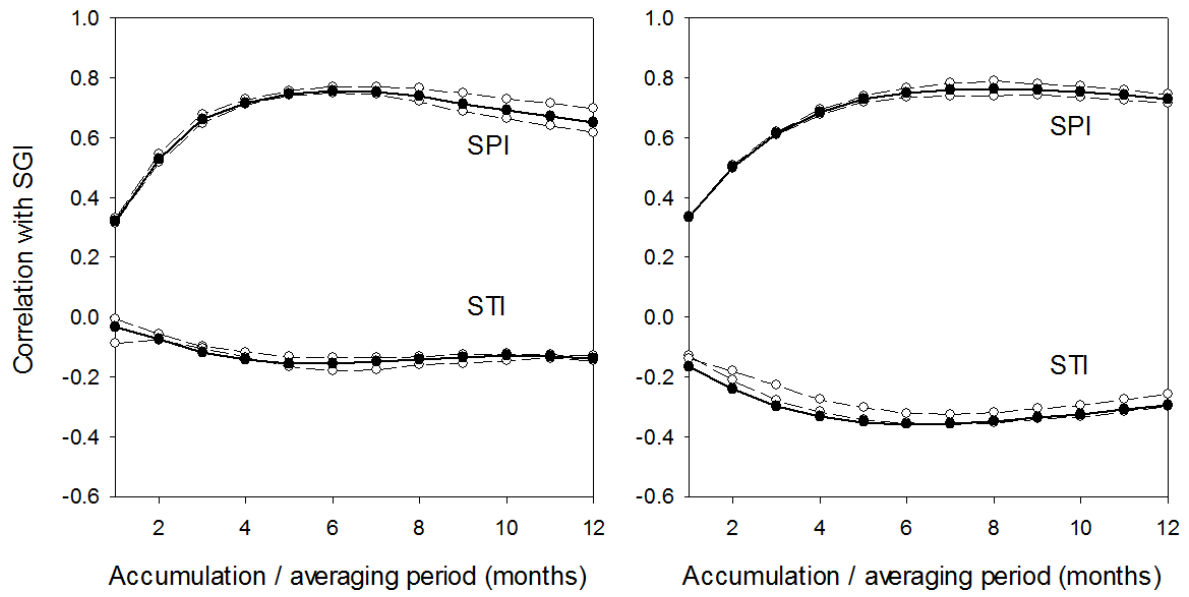

31

32

33

34

35

36

37

38

39

40

**Figure S4. Variation in Pearson correlation coefficient between SGI and SPI for a range of SPI accumulation periods and between SGI and STI for a range of STI averaging periods. Solid lines show the correlation for the entire time series, the dashed lines indicate correlations for first and last third of the record.**

41 **Tables**

42 **Table S1. Percentage of months of SGI in a given standardised range for the whole record and for each third of the**  
 43 **observational record**

| Period    | CH SGI              |                |                |             |              |         | DH SGI              |                |                |             |              |         |
|-----------|---------------------|----------------|----------------|-------------|--------------|---------|---------------------|----------------|----------------|-------------|--------------|---------|
|           | SGI <=-2            | SGI <=-1 & >-2 | SGI <=-0 & >-1 | SG I>0 & <1 | SGI >=1 & <2 | SGI >=2 | SGI <=-2            | SGI <=-1 & >-2 | SGI <=-0 & >-1 | SG I>0 & <1 | SGI >=1 & <2 | SGI >=2 |
| 1890-2015 | 1.6                 | 14.3           | 35.2           | 34.4        | 13.6         | 1.6     | 1.6                 | 14.3           | 35.2           | 34.4        | 13.6         | 1.6     |
| 1890-1932 | 0.2                 | 10.1           | 37.3           | 36.7        | 13.9         | 1.8     | 0.4                 | 9.5            | 32.5           | 42.5        | 14.1         | 1       |
| 1933-1973 | 1.8                 | 14.6           | 34.8           | 33.9        | 13.6         | 1.2     | 0.2                 | 11.8           | 33.5           | 34.1        | 17.7         | 2.6     |
| 1974-2015 | 2.8                 | 18.3           | 31.2           | 30.4        | 15.5         | 1.8     | 4.2                 | 21.7           | 37.2           | 26.6        | 9.1          | 1.2     |
| Period    | CH SPI <sub>6</sub> |                |                |             |              |         | DH SPI <sub>7</sub> |                |                |             |              |         |
|           | SGI <=-2            | SGI <=-1 & >-2 | SGI <=-0 & >-1 | SG I>0 & <1 | SGI >=1 & <2 | SGI >=2 | SGI <=-2            | SGI <=-1 & >-2 | SGI <=-0 & >-1 | SG I>0 & <1 | SGI >=1 & <2 | SGI >=2 |
| 1890-2015 | 1.6                 | 14.3           | 35.2           | 34.4        | 13.6         | 1.6     | 1.6                 | 14.3           | 35.2           | 34.4        | 13.6         | 1.6     |
| 1890-1932 | 1.6                 | 13.7           | 36.1           | 31.5        | 16.7         | 0.4     | 1.4                 | 12.9           | 31.2           | 41.7        | 11.5         | 1.4     |
| 1933-1973 | 1.2                 | 17.9           | 33.9           | 33.3        | 12.6         | 1.0     | 1.6                 | 12.6           | 38.2           | 26          | 19.7         | 1.8     |
| 1974-2015 | 2.0                 | 11.5           | 33.2           | 36.2        | 13.7         | 3.4     | 1.8                 | 17.5           | 34             | 35.4        | 9.7          | 1.6     |
| Period    | CH STI <sub>6</sub> |                |                |             |              |         | DH STI <sub>7</sub> |                |                |             |              |         |
|           | SGI <=-2            | SGI <=-1 & >-2 | SGI <=-0 & >-1 | SG I>0 & <1 | SGI >=1 & <2 | SGI >=2 | SGI <=-2            | SGI <=-1 & >-2 | SGI <=-0 & >-1 | SG I>0 & <1 | SGI >=1 & <2 | SGI >=2 |
| 1890-2015 | 1.6                 | 14.3           | 35.2           | 34.4        | 13.6         | 1.6     | 1.6                 | 14.3           | 35.2           | 34.4        | 13.6         | 1.6     |
| 1890-1932 | 0                   | 4.8            | 29             | 42.1        | 21.8         | 2.4     | 0                   | 1.8            | 21.8           | 48          | 25           | 3.4     |
| 1933-1973 | 0                   | 8.5            | 38.4           | 34.8        | 16.5         | 1.8     | 0.2                 | 10             | 43.7           | 32.1        | 12.6         | 1.4     |
| 1974-2015 | 4.8                 | 29.6           | 36             | 24.3        | 4.8          | 0.6     | 4.6                 | 31.2           | 38             | 23.1        | 3.2          | 0       |

44

45

46 **Table S2. Percentage of groundwater drought months associated with SPI<=-1, STI>=1, and SPI<=-1 and STI>=0 for**  
 47 **three time periods and for CH and DH.**

| Period    | CH      |        |                   | DH      |        |                   |
|-----------|---------|--------|-------------------|---------|--------|-------------------|
|           | SPI<=-1 | STI>=1 | SPI<=-1 & STI >=1 | SPI<=-1 | STI>=1 | SPI<=-1 & STI >=1 |
| 1890-1932 | 67.3%   | 7.7%   | 7.7%              | 71.2%   | 11.5%  | 9.6%              |
| 1933-1973 | 67.9%   | 11.1%  | 6.2%              | 37.0%   | 16.0%  | 8.6%              |
| 1974-2015 | 50.0%   | 48.1%  | 22.6%             | 67.0%   | 51.9%  | 29.2%             |

48

49 **Table S3. Summary statistics for episodes of groundwater drought at CH and DH**

| Site & period | Total no. drought episodes | No. episodes where SGI intensity <-1 | Average duration of all episodes (months) | Average SGI intensity of all episodes | Average SPI of all episodes | Average STI of all episodes |
|---------------|----------------------------|--------------------------------------|-------------------------------------------|---------------------------------------|-----------------------------|-----------------------------|
| CH            |                            |                                      |                                           |                                       |                             |                             |
| 1891-2015     | 45                         | 16                                   | 10.7                                      | -0.91                                 | -0.72                       | 0.15                        |
| 1891-1932     | 12                         | 2                                    | 10.9                                      | -0.71                                 | -0.72                       | -0.26                       |
| 1933-1973     | 14                         | 5                                    | 11.8                                      | -0.94                                 | -0.84                       | -0.20                       |
| 1974-2015     | 19                         | 9                                    | 9.8                                       | -1.00                                 | -0.64                       | 0.67                        |
| DH            |                            |                                      |                                           |                                       |                             |                             |
| 1891-2015     | 33                         | 8                                    | 16.4                                      | -1.51                                 | -0.71                       | 0.23                        |
| 1891-1932     | 9                          | 2                                    | 14.2                                      | -1.20                                 | -0.90                       | -0.27                       |
| 1933-1973     | 8                          | 3                                    | 17.3                                      | -1.29                                 | -0.80                       | 0.05                        |
| 1974-2015     | 16                         | 4                                    | 17.3                                      | -1.51                                 | -0.55                       | 0.60                        |

50

51
